# Supplementary material for: Imprinted Dlk1 dosage as a size determinant of the mammalian pituitary gland
Source: eLife journal article supplement (doi:10.7554/elife.84092), 2023-08-17
Supplement: supp [file elife_poa_e84092_Transparent_Reporting_File.docx]

| **Key Resources Table** | | | | |
| --- | --- | --- | --- | --- |
| **Reagent type (species) or resource** | **Designation** | **Source or reference** | **Identifiers** | **Additional information** |
| gene (Mus musculus) | Delta-like homologue 1 (Dlk1) | MGI:94900 | Dlk1 |  |
| strain, strain background (Mus musculus, males and female) | C57BL6J |  | WT |  |
| genetic reagent (Mus musculus) | *Dlk1*tm1Srba | Raghunandan, 2008  MGI:3526402 | “Dlk1 deletion; PAT; PAT-TG” |  |
| genetic reagent (Mus musculus) | Tg*Dlk1-70* | daRocha, 2009 | “Dlk1 transgenic; WT-TG; PAT-TG” |  |
| Antibody | Anti-SOX2 (Goat Polyclonal) | Immune Systems Ltd | Anti-SOX2 | GT15098, RRID:[AB_2195800](https://scicrunch.org/resolver/RRID:AB_2195800) |
| Antibody | Anti-SOX2(Rabbit Monoclonal) | Abcam | Anti-SOX2 | ab92494, RRID:[AB_10585428](https://scicrunch.org/resolver/RRID:AB_10585428) |
| Antibody | Anti-POU1F1 (PIT1) (Rabbit Monoclonal) | Gifted by Dr S. J. Rhodes (IUPUI, USA) | Anti-POU1F1 | 422_Rhodes, RRID:[AB_2722652](https://scicrunch.org/resolver/RRID:AB_2722652) |
| Antibody | Anti-pHH3 (Rabbit Polyclonal) | Millipore | Anti-pHH3 | 05-806, Anti-phospho-Histone H3 (Ser10) Antibody, clone 3H10 https://www.merckmillipore.com/GB/en/product/Anti-phospho-Histone-H3-Ser10-Antibody-clone-3H10,MM_NF-05-806 |
| Antibody | Anti-GH (Rabbit Polyclonal) | National Hormone and Peptide Program (NHPP) | Anti-GH | AFP-5641801 |
| Antibody | Anti-TSH (Rabbit Polyclonal) | National Hormone and Peptide Program (NHPP) | Anti-TSH | AFP-1274789 |
| Antibody | Anti-PRL (Rabbit Polyclonal) | National Hormone and Peptide Program (NHPP) | Anti-PRL | AFP-4251091 |
| Antibody | Anti-ACTH (Mouse Monoclonal) | National Hormone and Peptide Program (NHPP) | Anti-ACTH | AFP-156102789 |
| Antibody | Anti-DLK1 (Rabbit monoclonal) | abcam | Anti-DLK1 | ab21682  https://www.abcam.com/products/primary-antibodies/dlk-1-antibody-ab21682.html |
| Antibody | Anti-DLK1 (Goat polyclonal) | R&D | AF8277 | AF8277  https://www.rndsystems.com/products/mouse-pref-1-dlk1-fa1-antibody_af8277 |
| Antibody | Anti-HES1 | Cell Signaling Technologies | Anti-HES1 | D6P2U |
| Antibody | Anti-Rabbit 488 (Goat Polyclonal) | Life Technologies | Anti-rabbit 488 | A11008, RRID:[AB_143165](https://scicrunch.org/resolver/RRID:AB_143165) |
| Antibody | Anti-Rabbit 647 (Goat Polyclonal) | Life Technologies | Anti-rabbit 594 | A21050, RRID:[AB_141431](https://scicrunch.org/resolver/RRID:AB_141431) |
| Antibody | anti-Digoxigenin-AP | Millipore-SIGMA | Anti-DIG | 45-11093274910 |
| Antibody | Anti-alpha tubulin | Millipore-SIGMA | Anti-tub | T5168 |
| Antibody | Anti-Goat 488 (Donkey Polyclonal) | Abcam | Anti-goat 488 | ab150133, RRID:[AB_2832252](https://scicrunch.org/resolver/RRID:AB_2832252) |
| Antibody | biotinylated goat α-rabbit | Vector Laboratories | biotinylated goat α-rabbit | BA-1000 |
| Antibody | biotinylated goat α-mouse | Vector Laboratories | biotinylated goat α-mouse | BA-9200 |
| Antibody | biotinylated α -goat | Vector Laboratories | biotinylated α -goat | BA9500 |
| Sequence-based reagent | RNAscope probe *M. musculus Axin2* | Advanced Cell Diagnostics | Mm-Axin2 | 400331 |
| Sequence-based reagent | RNAscope probe *M. musculus Shh* | Advanced Cell Diagnostics | Mm-Shh | 314361 |
| Sequence-based reagent | RNAscope probe *M. musculus Fgf8* | Advanced Cell Diagnostics | Mm-Fgf8 | 313411 |
| Sequence-based reagent | RNAscope probe *M. musculus Fgf10* | Advanced Cell Diagnostics | Mm-Fgf10 | 446371 |
| Sequence-based reagent | RNAscope probe *M. musculus*  *Lef1* | Advanced Cell Diagnostics | Mm-Lef1 | 441861 |
| Sequence-based reagent | Dlk1 qPCR Forward primer | PMID: 25349437 |  | GAAAGGACTGCCAGCACAAG |
| Sequence-based reagent | Dlk1 qPCR Reverse primer | PMID: 25349437 |  | CACAGAAGTTGCCTGAGAAGC |
| Sequence-based reagent | Dlk1 splice qPCR Forward primer | PMID: 25349437 |  | CTGCACACCTGGGTTCTCTG |
| Sequence-based reagent | Dlk1 splice qPCR Reverse primer | PMID: 25349437 |  | CTGCACACCTGGGTTCTCTG |
| Sequence-based reagent | Ghrh qPCR Forward primer | This paper |  | GCTGTATGCCCGGAAAAGTGAT |
| Sequence-based reagent | Ghrh qPCR Reverse primer | This paper |  | AATCCCTGCAAGATGCTCTCC |
| Sequence-based reagent | Sst qPCR Forward primer | This paper |  | CCCAGACTCCGTCAGTTTCT |
| Sequence-based reagent | Sst qPCR Reverse primer | This paper |  | GGGCATCATTCTCTGTCTGG |
| Sequence-based reagent | Actb qPCR Forward primer | PMID: 25349437 |  | TTCTTTGCAGCTCCTTCGTT |
| Sequence-based reagent | Actb qPCR Reverse primer | PMID: 25349437 |  | ATGGAGGGGAATACAGCCC |
| Sequence-based reagent | Tuba qPCR Forward primer | PMID: 25349437 |  | AGACCATTGGGGGAGGAGAT |
| Sequence-based reagent | Tuba qPCR Reverse primer | PMID: 25349437 |  | GTGGGTTCCAGGTCTACGAA |
|  |  |  |  |  |
| Commercial assay or kit | RNAScope 2.5 HD Assay-RED | Advanced Cell Diagnostics |  | 322350 |
| Commercial  assay or kit | ABC kit | Vector Laboratories |  | Cat# Vector PK-6100  RRID:[AB_2336819](https://scicrunch.org/resolver/AB_2336819) |
| Commercial  assay or kit | BCA assay | Thermo Fisher | Cat# 23227 |  |
| Commercial  assay or kit | REDTaq® ReadyMix™ PCR Reaction Mix | Sigma-Aldrich (Merck) | R2523 |  |
| Software, algorithm | Prism 9 | GraphPad Software |  | <https://www.graphpad.com/> |
| Software, algorithm | NDP View | Hamamatsu Photonics |  | <https://www.hamamatsu.com/> |
| Software, algorithm | The Galaxy Platform | [Afgan et al., 2016](https://elifesciences.org/articles/59142#bib1); [Blankenberg et al., 2010](https://elifesciences.org/articles/59142#bib9); [Goecks et al., 2010](https://elifesciences.org/articles/59142#bib22) |  | <https://usegalaxu.org>  RRID:[SCR_006281](https://scicrunch.org/resolver/RRID:SCR_006281) |
| Software, algorithm | DESeq2 v2.11.38 | [Love et al., 2014](https://elifesciences.org/articles/59142#bib35) |  | <https://github.com/Bioconductor-mirror/DESeq2>  RRID:[SCR_015687](https://scicrunch.org/resolver/RRID:SCR_015687) |
| Software, algorithm | featureCounts v1.4.6p5 | [Liao et al., 2014](https://elifesciences.org/articles/59142#bib31) |  | <http://subread.sourceforge.net/>  RRID:[SCR_012919](https://scicrunch.org/resolver/RRID:SCR_012919) |
| Software, algorithm | QuPath | PMID: 29203879 |  | https://qupath.readthedocs.io/en/0.4/ |
