# Supplementary material for: Imprinted Dlk1 dosage as a size determinant of the mammalian pituitary gland
Source: eLife journal article supplement (doi:10.7554/elife.84092), 2023-08-17
Supplement: supp [file Figure1_data.xlsx]

## Sheet: Fig1B_RT_qPCR
WT	WT-TG
1.466	2.962
1.088	1.979
0.304	4.942
0.732	1.482
0.939	1.339
1.313	3.768
1.149	2.319
Figure 1B. RT-qPCR data for Dlk1 expression from whole pituitary gland at 12 weeks, females. Normalised to mean WT = 1, with B-actin as housekeeping gene.

## Sheet: Fig1D&G_Raw_proportion_volumes
Proportion	WT							WT-TG
Pituitary#	TG14.5	TG14.3	TG12.4	TG12.2	TG11.8	TG17.2	TG17.10	TG1.2	TG1.5	TG1.3	TG13.1	TG14.2	TG12.1	TG17.4
GH+	0.01928	0.0177	0.0316623	0.00986842	0.0242511	0.0150754	0.0154083	0.01325	0.01895	0.0111576	0.00657895	0.0219479	0.00837989	0.0209125
DLK1+/GH+	0.23416	0.25811	0.296834	0.282895	0.269615	0.273032	0.283513	0.298013	0.309038	0.281729	0.264474	0.251029	0.277933	0.277567
PRL+	0.1274	0.14192	0.137931	0.131216				0.10152	0.15439	0.125554	0.13754
DLK1+/PRL+	0.07504	0.08809	0.0708812	0.0773481				0.07727	0.06667	0.0694239	0.0728155
TSH+	0.0463	0.06091	0.0633562	0.0594228				0.05451	0.04444	0.0624071	0.0614173
DLK1+/TSH+	0.03333	0.03553	0.0410959	0.0424448				0.02896	0.03519	0.0371471	0.0377953
FSH +ve	0.08896	0.066						0.075	0.07203
DLK1+/FSH+	0.01647	0.02						0.01667	0.0201
ACTH+	0.1179	0.13957	0.124812	0.134561				0.0866	0.10708	0.116618	0.123881
DLK1+/ACTH+	0	0.00144	0	0				0	0	0	0
Volume	0.94956	0.848707	0.945	0.826875	0.704375	0.97125	0.95375	1.27265	1.2294	1.05438	0.993125	1.25563	1.02813	1.28625
GH+	0.0183075	0.0150221	0.0299208	0.00815995	0.0170818	0.014642	0.0146957	0.0168626	0.0232972	0.0117643	0.00653372	0.0275583	0.00861557	0.0268988
DLK1+/GH+	0.222305	0.219073	0.280508	0.233919	0.18991	0.265182	0.270401	0.379408	0.379924	0.297048	0.262655	0.315198	0.28575	0.35702
PRL+	0.108499	0.13474	0.123737	0.0971552				0.175106	0.127465	0.198579	0.124691
DLK1+/PRL+	0.0639572	0.0836317	0.0728861	0.049927				0.0927033	0.0970256	0.08575	0.0689466
TSH+	0.0491352	0.0578299	0.0449653	0.0446265				0.0755049	0.0794521	0.0684497	0.0571667
DLK1+/TSH+	0.0350966	0.0337341	0.032375	0.0289469				0.0464646	0.0472929	0.0363639	0.0452569
FSH +ve	0.0864044	0.0626587						0.0922031	0.0715316
DLK1+/FSH+	0.0160008	0.0189875						0.0204896	0.0199623
ACTH+	0.111265	0.118493	0.114508	0.0983085				0.157716	0.108742	0.137729	0.115816
DLK1+/ACTH+	0	0	0	0.00101349				0	0	0	0
	WT			WT-TG
Cell	Mean	SD	n	Mean	SD	n
GH+	0.0190351	0.00267864	7	0.0144538	0.00233662	7
DLK1+/GH+	0.271166	0.00770689	7	0.279969	0.00733752	7
PRL+	0.134617	0.00326563	4	0.129751	0.0111144	4
DLK1+/PRL+	0.0778398	0.00366934	4	0.0715449	0.002285	4
TSH+	0.0574972	0.00381946	4	0.0556936	0.00414203	4
DLK1+/TSH+	0.0381002	0.00218347	4	0.0347731	0.00201526	4
FSH +ve	0.07748	0.01148	2	0.073515	0.001485	2
DLK1+/FSH+	0.018235	0.001765	2	0.018385	0.001715	2
ACTH+	0.129211	0.00485816	4	0.108545	0.00808334	4
DLK1+/ACTH+	0.00036	0.00036	4	0	0	4
Unclassified	0.176607			0.213214
	WT			WT-TG
Proportion of cells	Mean	SD	n	Mean	SD	n
GH+	0.290143	0.023	7	0.294	0.02	7
% co-stained DLK1	93.4407			95.0908
PRL+	0.2125	0.012	4	0.201	0.018	4
% co-stained DLK1	36.638			35.5421
TSH+	0.096	0.011	4	0.091	0.01	4
% co-stained DLK1	39.8548			38.4375
FSH +ve	0.096	0.013	2	0.092	0	2
% co-stained DLK1	19.0514			20.0054
ACTH+	0.13	0.01	4	0.109	0.016	4
% co-stained DLK1	0.277841			0	0

## Sheet: Fig1F_Volumes_adults
ID	Genotype	Total volume (^mm)	AL volume (^mm)	IL volume (^mm)	PL volume (^mm)
TG12.5	WT	0.888125	0.824688	nd	0.0634375				genotype	average Vol AL (mm^3)	sd_AL	average Vol IL (mm^3)	sd_IL	average Vol PL (mm^3)	sd_PL	n
TG12.2	WT	0.826875	0.79625	nd	0.030625			12 week females	WT	0.770155	0.138209	0.0795338	0.0234073	0.0527774	0.0131264	12
TG14.3	WT	0.84875	0.800625	nd	0.048125				WT-TG	1.03804	0.139026	0.0967347	0.0216534	0.0604744	0.0250687	13
TG14.5	WT	0.949375	0.903438	nd	0.0459375
TG17.2	WT	0.97125	0.920937	nd	0.0503125
TG17.10	WT	0.95375	0.912187	nd	0.0415625
TG11.8	WT	0.704375	0.649687	nd	0.0546875
TGK6.4	WT	0.706212	0.612846	0.0561496	0.0372163
TGK6.5	WT	0.682084	0.568317	0.0538532	0.0599146
A29	WT	0.811451	0.65352	0.093884	0.0640472
KS4.1	WT	0.789667	0.642331	0.0874888	0.0598472
A30	WT	1.14094	0.957029	0.106294	0.077616
TG12.10	WT-TG	1.19875	1.155	nd	0.04375
TG12.1	WT-TG	1.02812	0.993125	nd	0.035
TG1.5	WT-TG	1.22938	1.1725	nd	0.056875
TG1.2	WT-TG	1.27313	1.22719	nd	0.0459375
TG1.3	WT-TG	1.05438	1.01938	nd	0.035
TG14.2	WT-TG	1.25562	1.2075	nd	0.048125
TG13.1	WT-TG	0.98875	0.934063	nd	0.0546875
TG13.3	WT-TG	0.993125	0.960313	nd	0.0328125
TGK4.1	WT-TG	0.955933	0.827214	0.0620238	0.0666956
TGK4.2	WT-TG	1.08161	0.903894	0.106691	0.0710223
TGK6.3	WT-TG	1.35548	1.15352	0.112201	0.0897586
TGK6.2	WT-TG	1.30489	1.09601	0.113403	0.0954751
TGK6.6	WT-TG	1.04521	0.844827	0.0893545	0.111028
