# Supplementary material for: Imprinted Dlk1 dosage as a size determinant of the mammalian pituitary gland
Source: eLife journal article supplement (doi:10.7554/elife.84092), 2023-08-17
Supplement: supp [file Figure4_data.xlsx]

## Sheet: Fig4A_TableS2raw_weights
ID	genotype	age	sex	weight (g)
KODK94.3	WT	E11.5	n/a	0.0413				Genotype	Total body mass (g)
KODK94.4	WT	E11.5	n/a	0.05					Mean	SD	n	p vs WT	p vs PAT
KODK94.5	WT	E11.5	n/a	0.0392			E11.5	WT	0.0464091	0.00427632	11
KODK96.11	WT	E11.5	n/a	0.0473				WT-TG	0.0457818	0.0043499	11	ns
KODK96.12	WT	E11.5	n/a	0.0452				PAT	0.0444375	0.00432102	8	ns
KODK96.8	WT	E11.5	n/a	0.0479				PAT-TG	0.0433143	0.00811982	7	ns	ns
KODK98.4	WT	E11.5	n/a	0.0479			E13.5	WT	0.1447	0.0136214	7
KODK98.6	WT	E11.5	n/a	0.0499				WT-TG	0.138124	0.0156824	17	ns
KODK99.2	WT	E11.5	n/a	0.0539				PAT	0.146781	0.0110548	16	ns
KODK99.5	WT	E11.5	n/a	0.0455				PAT-TG	0.1464	0.0181412	10	ns	ns
KODK99.7	WT	E11.5	n/a	0.0424			E18.5	WT	1.20625	0.131067	24
KODK94.6	WT-TG	E11.5	n/a	0.0437				WT-TG	1.21104	0.105992	32	ns
KODK96.1	WT-TG	E11.5	n/a	0.0381				PAT	1.02053	0.0711367	15	<0.0001
KODK96.5	WT-TG	E11.5	n/a	0.0461				PAT-TG	1.11066	0.0808161	20	0.0125	0.0513
KODK98.10	WT-TG	E11.5	n/a	0.0427			P7	WT	4.03286	0.268186	7
KODK98.2	WT-TG	E11.5	n/a	0.0413				WT-TG	3.828	0.219704	5	ns
KODK98.3	WT-TG	E11.5	n/a	0.0476				PAT	3.09333	0.254165	9	0.0003
KODK98.7	WT-TG	E11.5	n/a	0.0496				PAT-TG	3.773	0.592603	10	ns	0.0038
KODK98.9	WT-TG	E11.5	n/a	0.0437			P14	WT	7.8124	0.6887	17
KODK99.3	WT-TG	E11.5	n/a	0.05				WT-TG	8.6843	0.6171	7	0.0161
KODK99.4	WT-TG	E11.5	n/a	0.053				PAT	5.6	0.64198	8	<0.0001
KODK99.8	WT-TG	E11.5	n/a	0.0478				PAT-TG	6.764	0.24633	5	0.0097	0.0105
KODK96.10	PAT	E11.5	n/a	0.0454			P21	WT	10.712	1.60838	10
KODK96.6	PAT	E11.5	n/a	0.0497				WT-TG	11.0489	1.10161	9	ns
KODK96.7	PAT	E11.5	n/a	0.0396				PAT	8.81167	1.06439	6	0.0129	ns
KODK98.11	PAT	E11.5	n/a	0.0391				PAT-TG	10.1354	0.775195	13	ns
KODK98.5	PAT	E11.5	n/a	0.0512
KODK99.1	PAT	E11.5	n/a	0.044
KODK99.6	PAT	E11.5	n/a	0.0441				Individuals in each age group compared by One-Way ANOVA with post-hoc pairwise testing WT vs WT-TG, PAT, PAT-TG and PAT vs PAT-TG, corrected for multiple comparisons using Bonferroni's adjustment.
KODK99.9	PAT	E11.5	n/a	0.0424
KODK94.2	PAT-TG	E11.5	n/a	0.059
KODK94.8	PAT-TG	E11.5	n/a	0.0413
KODK96.2	PAT-TG	E11.5	n/a	0.0341
KODK96.3	PAT-TG	E11.5	n/a	0.0407
KODK96.4	PAT-TG	E11.5	n/a	0.0486
KODK98.1	PAT-TG	E11.5	n/a	0.0402
KODK98.8	PAT-TG	E11.5	n/a	0.0393
KODK107.4	WT	E13.5	n/a	0.1486
KODK107.5	WT	E13.5	n/a	0.1523
KODK108.2	WT	E13.5	n/a	0.1522
TGDK17.2	WT	E13.5	n/a	0.1398
TGDK18.2	WT	E13.5	n/a	0.1516
TGDK18.4	WT	E13.5	n/a	0.1156
TGDK18.7	WT	E13.5	n/a	0.1528
KODK107.6	WT-TG	E13.5	n/a	0.1487
KODK107.8	WT-TG	E13.5	n/a	0.1426
KODK108.5	WT-TG	E13.5	n/a	0.1274
KODK108.6	WT-TG	E13.5	n/a	0.15
TGDK17.1	WT-TG	E13.5	n/a	0.1237
TGDK17.3	WT-TG	E13.5	n/a	0.1189
TGDK17.4	WT-TG	E13.5	n/a	0.1451
TGDK17.5	WT-TG	E13.5	n/a	0.1596
TGDK17.6	WT-TG	E13.5	n/a	0.1359
TGDK17.7	WT-TG	E13.5	n/a	0.1148
TGDK17.8	WT-TG	E13.5	n/a	0.1442
TGDK17.9	WT-TG	E13.5	n/a	0.1151
TGDK18.1	WT-TG	E13.5	n/a	0.152
TGDK18.3	WT-TG	E13.5	n/a	0.1592
TGDK18.5	WT-TG	E13.5	n/a	0.1535
TGDK18.6	WT-TG	E13.5	n/a	0.1166
TGDK18.8	WT-TG	E13.5	n/a	0.1408
KODK107.1	PAT	E13.5	n/a	0.1291
KODK108.1	PAT	E13.5	n/a	0.1355
KODK108.4	PAT	E13.5	n/a	0.1604
KODK108.7	PAT	E13.5	n/a	0.1521
KODK22.1a	PAT	E13.5	n/a	0.1275
KODK22.1b	PAT	E13.5	n/a	0.1556
KODK22.1c	PAT	E13.5	n/a	0.1503
KODK22.1d	PAT	E13.5	n/a	0.1433
KODK22.1e	PAT	E13.5	n/a	0.1688
KODK22.1f	PAT	E13.5	n/a	0.1446
KODK22.1g	PAT	E13.5	n/a	0.1439
KODK22.1h	PAT	E13.5	n/a	0.1507
KODK22.1i	PAT	E13.5	n/a	0.1461
KODK23.1a	PAT	E13.5	n/a	0.136
KODK23.1b	PAT	E13.5	n/a	0.155
KODK23.1c	PAT	E13.5	n/a	0.1496
KODK107.2	PAT-TG	E13.5	n/a	0.1221
KODK107.3	PAT-TG	E13.5	n/a	0.1152
KODK107.7	PAT-TG	E13.5	n/a	0.14
KODK107.9	PAT-TG	E13.5	n/a	0.155
KODK108.8	PAT-TG	E13.5	n/a	0.1682
KODK23.1d	PAT-TG	E13.5	n/a	0.1548
KODK23.1e	PAT-TG	E13.5	n/a	0.1723
KODK23.1f	PAT-TG	E13.5	n/a	0.1398
KODK23.1i	PAT-TG	E13.5	n/a	0.1455
KODK23.1j	PAT-TG	E13.5	n/a	0.1511
KODK33.3	WT	E18.5	M	1.173
KODK33.7	WT	E18.5	F	0.992
KODK34.2	WT	E18.5	M	1.178
KODK34.4	WT	E18.5	M	0.813
KODK35.1	WT	E18.5	M	1.284
KODK35.4	WT	E18.5	M	1.28
KODK47.2	WT	E18.5	M	1.185
KODK47.7	WT	E18.5	M	1.1
KODK47.8	WT	E18.5	M	1.238
KODK52.3	WT	E18.5	F	1.2871
KODK52.6	WT	E18.5	F	1.0995
KODK52.7	WT	E18.5	M	1.2825
KODK61.1	WT	E18.5	F	1.188
KODK61.2	WT	E18.5	M	1.209
KODK60.2	WT	E18.5	F	1.308
KODK60.3	WT	E18.5	F	1.391
KODK60.4	WT	E18.5	M	1.335
KODK60.5	WT	E18.5	M	1.327
KODK60.6	WT	E18.5	F	1.363
KODK60.8	WT	E18.5	F	1.357
KODK68.7	WT	E18.5	M	1.087
KODK90.1	WT	E18.5	n/a	1.1528
KODK90.4	WT	E18.5	n/a	1.1646
KODK90.6	WT	E18.5	n/a	1.1554
KODK33.1	WT-TG	E18.5	F	1.099
KODK33.4	WT-TG	E18.5	F	1.152
KODK33.5	WT-TG	E18.5	M	1.039
KODK33.10	WT-TG	E18.5	n/a	1.025
KODK34.3	WT-TG	E18.5	M	1.159
KODK34.6	WT-TG	E18.5	M	1.082
KODK34.9	WT-TG	E18.5	F	1.212
KODK35.6	WT-TG	E18.5	F	1.222
KODK46.1	WT-TG	E18.5	F	1.097
KODK46.2	WT-TG	E18.5	F	1.292
KODK46.3	WT-TG	E18.5	M	1.246
KODK46.4	WT-TG	E18.5	F	1.115
KODK46.7	WT-TG	E18.5	F	1.184
KODK47.1	WT-TG	E18.5	M	1.334
KODK47.3	WT-TG	E18.5	M	1.222
KODK47.6	WT-TG	E18.5	F	1.223
KDOK52.1	WT-TG	E18.5	M	1.307
KODK62.8	WT-TG	E18.5	M	1.3229
KODK61.3	WT-TG	E18.5	M	1.195
KODK61.4	WT-TG	E18.5	M	1.321
KODK61.5	WT-TG	E18.5	M	1.239
KODK61.6	WT-TG	E18.5	F	1.328
KODK60.7	WT-TG	E18.5	F	1.395
KODK67.3	WT-TG	E18.5	F	1.415
KODK67.4	WT-TG	E18.5	M	1.426
KODK68.1	WT-TG	E18.5	M	1.212
KODK68.2	WT-TG	E18.5	F	1.149
KODK68.4	WT-TG	E18.5	F	1.118
KODK68.5	WT-TG	E18.5	F	1.082
KODK68.10	WT-TG	E18.5	F	1.192
KODK90.3	WT-TG	E18.5	n/a	1.1766
KODK90.5	WT-TG	E18.5	n/a	1.1719
KODK33.2	PAT	E18.5	F	1.008
KODK33.6	PAT	E18.5	M	0.921
KODK33.9	PAT	E18.5	F	0.935
KODK34.1	PAT	E18.5	F	1.047
KODK35.3	PAT	E18.5	M	1.142
KODK46.5	PAT	E18.5	F	0.923
KODK46.6	PAT	E18.5	M	1.037
KODK46.8	PAT	E18.5	F	0.979
KODK47.5	PAT	E18.5	n/a	0.969
KODK52.2	PAT	E18.5	M	0.988
KODK52.4	PAT	E18.5	F	1.0235
KODK52.5	PAT	E18.5	M	1.0369
KODK60.1	PAT	E18.5	M	1.146
KODK67.7	PAT	E18.5	M	1.093
KODK90.2	PAT	E18.5	n/a	1.0595
KODK33.8	PAT-TG	E18.5	F	0.987
KODK33.11	PAT-TG	E18.5	F	1.029
KODK34.5	PAT-TG	E18.5	F	1.035
KODK34.7	PAT-TG	E18.5	M	1.094
KODK34.8	PAT-TG	E18.5	M	0.99
KODK35.2	PAT-TG	E18.5	F	1.175
KODK35.5	PAT-TG	E18.5		1.238
KODK35.7	PAT-TG	E18.5	M	1.056
KODK46.9	PAT-TG	E18.5	F	1.025
KODK47.4	PAT-TG	E18.5	M	1.1
KODK67.1	PAT-TG	E18.5	M	1.271
KODK67.2	PAT-TG	E18.5	M	1.099
KODK67.5	PAT-TG	E18.5	F	1.106
KODK67.8	PAT-TG	E18.5	F	1.193
KODK68.3	PAT-TG	E18.5	M	1.059
KODK68.6	PAT-TG	E18.5	M	1.117
KODK68.8	PAT-TG	E18.5	F	1.16
KODK68.9	PAT-TG	E18.5	M	1.197
KODK90.7	PAT-TG	E18.5	n/a	1.184
KODK90.8	PAT-TG	E18.5	n/a	1.0982
TGDK46.3f	WT	P7	F	3.95
TGDK46.3i	WT	P7	F	3.55
KODK71.2	WT	P7	F	3.93
TGDK46.3a	WT	P7	M	4.41
TGDK46.3b	WT	P7	M	4.21
TGDK46.3h	WT	P7	M	4.11
KODK71.3	WT	P7	M	4.07
TGDK46.3e	WT-TG	P7	F	3.78
KODK71.11	WT-TG	P7	F	3.95
TGDK46.3c	WT-TG	P7	M	3.51
TGDK46.3d	WT-TG	P7	M	3.8
TGDK46.3g	WT-TG	P7	M	4.1
KODK25.2a	PAT	P7	F	3.12
KODK25.2b	PAT	P7	F	3.18
KODK25.2e	PAT	P7	F	3.14
KODK71.4	PAT	P7	F	3.2
KODK71.5	PAT	P7	F	3.22
KODK71.6	PAT	P7	F	3.55
KODK71.7	PAT	P7	F	2.87
KODK25.2g	PAT	P7	M	2.67
KODK71.8	PAT	P7	M	2.89
KODK25.2c	PAT-TG	P7	F	3.87
KODK28.1a	PAT-TG	P7	F	4.54
KODK28.1c	PAT-TG	P7	F	4.9
KODK25.2d	PAT-TG	P7	M	3.33
KODK25.2f	PAT-TG	P7	M	3.35
KODK28.1b	PAT-TG	P7	M	4.24
KODK71.1	PAT-TG	P7	M	3.58
KODK71.9	PAT-TG	P7	M	3.38
KODK71.10	PAT-TG	P7	M	3.3
KODK71.12	PAT-TG	P7	M	3.24
KODK117.3a	WT	P14	M	6.751
KODK117.3c	WT	P14	M	7.442
KODK117.3f	WT	P14	M	7.556
KODK117.3g	WT	P14	F	7.629
KODK117.3i	WT	P14	F	7.689
KODK117.3j	WT	P14	F	7.053
KODK144.1e	WT	P14	F	9.42
KODK155.1d	WT	P14	F	7.369
KODK155.1f	WT	P14	M	7.799
KODK156.1a	WT	P14	F	7.398
KODK156.1b	WT	P14	F	8.158
KODK156.1c	WT	P14	M	7.203
KODK156.1d	WT	P14	M	7.941
KODK156.1f	WT	P14	M	7.7
TGDK63.1b	WT	P14	M	8.2
TGDK63.1c	WT	P14	M	8.4
TGDK63.1d	WT	P14	F	9.1
KODK144.1a	WT-TG	P14	F	8.34
KODK144.1d	WT-TG	P14	M	9.44
KODK144.1h	WT-TG	P14	M	8.69
KODK155.1a	WT-TG	P14	M	8.07
KODK155.1b	WT-TG	P14	M	7.947
TGDK63.1a	WT-TG	P14	F	8.8
TGDK63.1e	WT-TG	P14	M	9.5
KODK117.3b	PAT	P14	M	5.377
KODK117.3d	PAT	P14	M	5.211
KODK117.3e	PAT	P14	M	5.556
KODK117.3h	PAT	P14	F	5
KODK144.1b	PAT	P14	M	7.07
KODK144.1c	PAT	P14	F	5.52
KODK155.1e	PAT	P14	M	5.804
KODK155.1h	PAT	P14	M	5.261
KODK144.1g	PAT-TG	P14	F	6.8
KODK144.1f	PAT-TG	P14	M	6.98
KODK155.1c	PAT-TG	P14	M	6.999
KODK155.1g	PAT-TG	P14	M	6.421
KODK156.1e	PAT-TG	P14	F	6.623
KODK36.1b	WT	P21	M	8.93
KODK36.1d	WT	P21	M	8.52
KODK36.1g	WT	P21	F	10
KODK36.1i	WT	P21	F	9.47
KODK44.4a	WT	P21	M	12.4
KODK44.4f	WT	P21	F	12.2
KODK44.4h	WT	P21	F	11.8
KODK48.1d	WT	P21	F	11.4
TGDK30.5b	WT	P21	M	12.94
TGDK30.5d	WT	P21	F	9.46
KODK36.1h	WT-TG	P21	F	9.16
KODK44.4d	WT-TG	P21	M	10.5
KODK44.4e	WT-TG	P21	M	11.7
KODK44.4g	WT-TG	P21	F	12.4
KODK48.1b	WT-TG	P21	F	10.2
KODK48.1e	WT-TG	P21	F	10.8
KODK48.1f	WT-TG	P21	F	10.4
TGDK30.5a	WT-TG	P21	M	12.09
TGDK30.5c	WT-TG	P21	F	12.19
KODK26.1d	PAT	P21	F	9.11
KODK36.1a	PAT	P21	M	7.61
KODK36.1e	PAT	P21	F	8.22
KODK36.1f	PAT	P21	F	7.93
KODK44.4b	PAT	P21	M	10.3
KODK48.1a	PAT	P21	M	9.7
KODK25.1a	PAT-TG	P21	M	9.98
KODK25.1b	PAT-TG	P21	M	10.07
KODK25.1c	PAT-TG	P21	M	10.39
KODK26.1a	PAT-TG	P21	M	10.72
KODK26.1b	PAT-TG	P21	M	8.41
KODK25.1d	PAT-TG	P21	F	10.53
KODK25.1e	PAT-TG	P21	F	10.79
KODK25.1f	PAT-TG	P21	F	9.6
KODK26.1c	PAT-TG	P21	F	10.09
KODK26.1e	PAT-TG	P21	F	10.18
KODK48.1c	PAT-TG	P21	F	9.7
KODK44.4c	PAT-TG	P21	M	11.7
KODK44.4i	PAT-TG	P21	F	9.6

## Sheet: Fig4A_proportions
ID	genotype	age	sex	weight(g)	ratio
KODK94.6	WT-TG	E11.5	n/a	0.0437	0.94181
KODK96.1	WT-TG	E11.5	n/a	0.0381	0.821121				genotype	mean ratio	sd	n
KODK96.5	WT-TG	E11.5	n/a	0.0461	0.993534			E11.5	WT-TG	0.986677	0.0937479	11
KODK98.10	WT-TG	E11.5	n/a	0.0427	0.920259				PAT	0.957705	0.0931255	8
KODK98.2	WT-TG	E11.5	n/a	0.0413	0.890086				PAT-TG	0.933498	0.174996	7
KODK98.3	WT-TG	E11.5	n/a	0.0476	1.02586			E13.5	WT-TG	0.954551	0.108379	17
KODK98.7	WT-TG	E11.5	n/a	0.0496	1.06897				PAT	1.01438	0.076398	16
KODK98.9	WT-TG	E11.5	n/a	0.0437	0.94181				PAT-TG	1.01175	0.125371	10
KODK99.3	WT-TG	E11.5	n/a	0.05	1.07759			E18.5	WT-TG	1.00398	0.0878695	32
KODK99.4	WT-TG	E11.5	n/a	0.053	1.14224				PAT	0.846035	0.0589736	15
KODK99.8	WT-TG	E11.5	n/a	0.0478	1.03017				PAT-TG	0.920758	0.066998	20
KODK96.10	PAT	E11.5	n/a	0.0454	0.978448			P7	WT-TG	0.949203	0.0544786	5
KODK96.6	PAT	E11.5	n/a	0.0497	1.07112				PAT	0.767033	0.0630236	9
KODK96.7	PAT	E11.5	n/a	0.0396	0.853448				PAT-TG	0.935565	0.146944	10
KODK98.11	PAT	E11.5	n/a	0.0391	0.842672			P14	WT-TG	1.1129	0.080149	7
KODK98.5	PAT	E11.5	n/a	0.0512	1.10345				PAT	0.7175	0.083623	8
KODK99.1	PAT	E11.5	n/a	0.044	0.948276				PAT-TG	0.866	0.032094	5
KODK99.6	PAT	E11.5	n/a	0.0441	0.950431			P21	WT-TG	1.03145	0.102839	9
KODK99.9	PAT	E11.5	n/a	0.0424	0.913793				PAT	0.822598	0.0993647	6
KODK94.2	PAT-TG	E11.5	n/a	0.059	1.27155				PAT-TG	0.946171	0.0723669	13
KODK94.8	PAT-TG	E11.5	n/a	0.0413	0.890086
KODK96.2	PAT-TG	E11.5	n/a	0.0341	0.734914				Age	WT reference values (g)
KODK96.3	PAT-TG	E11.5	n/a	0.0407	0.877155				E11.5	0.0464
KODK96.4	PAT-TG	E11.5	n/a	0.0486	1.04741				E13.5	0.1447
KODK98.1	PAT-TG	E11.5	n/a	0.0402	0.866379				E18.5	1.20625
KODK98.8	PAT-TG	E11.5	n/a	0.0393	0.846983				P7	4.03286
KODK107.6	WT-TG	E13.5	n/a	0.1487	1.02764				P14	7.81
KODK107.8	WT-TG	E13.5	n/a	0.1426	0.985487				P21	10.712
KODK108.5	WT-TG	E13.5	n/a	0.1274	0.880442
KODK108.6	WT-TG	E13.5	n/a	0.15	1.03663
TGDK17.1	WT-TG	E13.5	n/a	0.1237	0.854872
TGDK17.3	WT-TG	E13.5	n/a	0.1189	0.8217
TGDK17.4	WT-TG	E13.5	n/a	0.1451	1.00276
TGDK17.5	WT-TG	E13.5	n/a	0.1596	1.10297
TGDK17.6	WT-TG	E13.5	n/a	0.1359	0.939185
TGDK17.7	WT-TG	E13.5	n/a	0.1148	0.793366
TGDK17.8	WT-TG	E13.5	n/a	0.1442	0.996545
TGDK17.9	WT-TG	E13.5	n/a	0.1151	0.795439
TGDK18.1	WT-TG	E13.5	n/a	0.152	1.05045
TGDK18.3	WT-TG	E13.5	n/a	0.1592	1.10021
TGDK18.5	WT-TG	E13.5	n/a	0.1535	1.06082
TGDK18.6	WT-TG	E13.5	n/a	0.1166	0.805805
TGDK18.8	WT-TG	E13.5	n/a	0.1408	0.973048
KODK107.1	PAT	E13.5	n/a	0.1291	0.892191
KODK108.1	PAT	E13.5	n/a	0.1355	0.93642
KODK108.4	PAT	E13.5	n/a	0.1604	1.1085
KODK108.7	PAT	E13.5	n/a	0.1521	1.05114
KODK22.1a	PAT	E13.5	n/a	0.1275	0.881133
KODK22.1b	PAT	E13.5	n/a	0.1556	1.07533
KODK22.1c	PAT	E13.5	n/a	0.1503	1.0387
KODK22.1d	PAT	E13.5	n/a	0.1433	0.990325
KODK22.1e	PAT	E13.5	n/a	0.1688	1.16655
KODK22.1f	PAT	E13.5	n/a	0.1446	0.999309
KODK22.1g	PAT	E13.5	n/a	0.1439	0.994471
KODK22.1h	PAT	E13.5	n/a	0.1507	1.04147
KODK22.1i	PAT	E13.5	n/a	0.1461	1.00968
KODK23.1a	PAT	E13.5	n/a	0.136	0.939876
KODK23.1b	PAT	E13.5	n/a	0.155	1.07118
KODK23.1c	PAT	E13.5	n/a	0.1496	1.03386
KODK107.2	PAT-TG	E13.5	n/a	0.1221	0.843815
KODK107.3	PAT-TG	E13.5	n/a	0.1152	0.79613
KODK107.7	PAT-TG	E13.5	n/a	0.14	0.967519
KODK107.9	PAT-TG	E13.5	n/a	0.155	1.07118
KODK108.8	PAT-TG	E13.5	n/a	0.1682	1.1624
KODK23.1d	PAT-TG	E13.5	n/a	0.1548	1.0698
KODK23.1e	PAT-TG	E13.5	n/a	0.1723	1.19074
KODK23.1f	PAT-TG	E13.5	n/a	0.1398	0.966137
KODK23.1i	PAT-TG	E13.5	n/a	0.1455	1.00553
KODK23.1j	PAT-TG	E13.5	n/a	0.1511	1.04423
KODK33.1	WT-TG	E18.5	F	1.099	0.911091
KODK33.4	WT-TG	E18.5	F	1.152	0.955029
KODK33.5	WT-TG	E18.5	M	1.039	0.86135
KODK33.10	WT-TG	E18.5	n/a	1.025	0.849744
KODK34.3	WT-TG	E18.5	M	1.159	0.960832
KODK34.6	WT-TG	E18.5	M	1.082	0.896998
KODK34.9	WT-TG	E18.5	F	1.212	1.00477
KODK35.6	WT-TG	E18.5	F	1.222	1.01306
KODK46.1	WT-TG	E18.5	F	1.097	0.909433
KODK46.2	WT-TG	E18.5	F	1.292	1.07109
KODK46.3	WT-TG	E18.5	M	1.246	1.03296
KODK46.4	WT-TG	E18.5	F	1.115	0.924356
KODK46.7	WT-TG	E18.5	F	1.184	0.981558
KODK47.1	WT-TG	E18.5	M	1.334	1.10591
KODK47.3	WT-TG	E18.5	M	1.222	1.01306
KODK47.6	WT-TG	E18.5	F	1.223	1.01389
KDOK52.1	WT-TG	E18.5	M	1.307	1.08353
KODK62.8	WT-TG	E18.5	M	1.3229	1.09671
KODK61.3	WT-TG	E18.5	M	1.195	0.990677
KODK61.4	WT-TG	E18.5	M	1.321	1.09513
KODK61.5	WT-TG	E18.5	M	1.239	1.02715
KODK61.6	WT-TG	E18.5	F	1.328	1.10094
KODK60.7	WT-TG	E18.5	F	1.395	1.15648
KODK67.3	WT-TG	E18.5	F	1.415	1.17306
KODK67.4	WT-TG	E18.5	M	1.426	1.18218
KODK68.1	WT-TG	E18.5	M	1.212	1.00477
KODK68.2	WT-TG	E18.5	F	1.149	0.952542
KODK68.4	WT-TG	E18.5	F	1.118	0.926843
KODK68.5	WT-TG	E18.5	F	1.082	0.896998
KODK68.10	WT-TG	E18.5	F	1.192	0.98819
KODK90.3	WT-TG	E18.5	n/a	1.1766	0.975423
KODK90.5	WT-TG	E18.5	n/a	1.1719	0.971527
KODK33.2	PAT	E18.5	F	1.008	0.835651
KODK33.6	PAT	E18.5	M	0.921	0.763526
KODK33.9	PAT	E18.5	F	0.935	0.775132
KODK34.1	PAT	E18.5	F	1.047	0.867982
KODK35.3	PAT	E18.5	M	1.142	0.946739
KODK46.5	PAT	E18.5	F	0.923	0.765184
KODK46.6	PAT	E18.5	M	1.037	0.859692
KODK46.8	PAT	E18.5	F	0.979	0.811609
KODK47.5	PAT	E18.5	n/a	0.969	0.803319
KODK52.2	PAT	E18.5	M	0.988	0.81907
KODK52.4	PAT	E18.5	F	1.0235	0.8485
KODK52.5	PAT	E18.5	M	1.0369	0.859609
KODK60.1	PAT	E18.5	M	1.146	0.950055
KODK67.7	PAT	E18.5	M	1.093	0.906117
KODK90.2	PAT	E18.5	n/a	1.0595	0.878345
KODK33.8	PAT-TG	E18.5	F	0.987	0.818241
KODK33.11	PAT-TG	E18.5	F	1.029	0.85306
KODK34.5	PAT-TG	E18.5	F	1.035	0.858034
KODK34.7	PAT-TG	E18.5	M	1.094	0.906946
KODK34.8	PAT-TG	E18.5	M	0.99	0.820728
KODK35.2	PAT-TG	E18.5	F	1.175	0.974097
KODK35.5	PAT-TG	E18.5		1.238	1.02632
KODK35.7	PAT-TG	E18.5	M	1.056	0.875443
KODK46.9	PAT-TG	E18.5	F	1.025	0.849744
KODK47.4	PAT-TG	E18.5	M	1.1	0.91192
KODK67.1	PAT-TG	E18.5	M	1.271	1.05368
KODK67.2	PAT-TG	E18.5	M	1.099	0.911091
KODK67.5	PAT-TG	E18.5	F	1.106	0.916894
KODK67.8	PAT-TG	E18.5	F	1.193	0.989019
KODK68.3	PAT-TG	E18.5	M	1.059	0.87793
KODK68.6	PAT-TG	E18.5	M	1.117	0.926014
KODK68.8	PAT-TG	E18.5	F	1.16	0.961661
KODK68.9	PAT-TG	E18.5	M	1.197	0.992335
KODK90.7	PAT-TG	E18.5	n/a	1.184	0.981558
KODK90.8	PAT-TG	E18.5	n/a	1.0982	0.910428
TGDK46.3e	WT-TG	P7	F	3.78	0.937301
KODK71.11	WT-TG	P7	F	3.95	0.979454
TGDK46.3c	WT-TG	P7	M	3.51	0.870351
TGDK46.3d	WT-TG	P7	M	3.8	0.94226
TGDK46.3g	WT-TG	P7	M	4.1	1.01665
KODK25.2a	PAT	P7	F	3.12	0.773645
KODK25.2b	PAT	P7	F	3.18	0.788523
KODK25.2e	PAT	P7	F	3.14	0.778604
KODK71.4	PAT	P7	F	3.2	0.793482
KODK71.5	PAT	P7	F	3.22	0.798441
KODK71.6	PAT	P7	F	3.55	0.880269
KODK71.7	PAT	P7	F	2.87	0.711654
KODK25.2g	PAT	P7	M	2.67	0.662062
KODK71.8	PAT	P7	M	2.89	0.716614
KODK25.2c	PAT-TG	P7	F	3.87	0.959617
KODK28.1a	PAT-TG	P7	F	4.54	1.12575
KODK28.1c	PAT-TG	P7	F	4.9	1.21502
KODK25.2d	PAT-TG	P7	M	3.33	0.825717
KODK25.2f	PAT-TG	P7	M	3.35	0.830677
KODK28.1b	PAT-TG	P7	M	4.24	1.05136
KODK71.1	PAT-TG	P7	M	3.58	0.887708
KODK71.9	PAT-TG	P7	M	3.38	0.838115
KODK71.10	PAT-TG	P7	M	3.3	0.818278
KODK71.12	PAT-TG	P7	M	3.24	0.803401
KODK117.3a	WT	P14	M	6.751	0.864405
KODK117.3c	WT	P14	M	7.442	0.952881
KODK117.3f	WT	P14	M	7.556	0.967478
KODK117.3g	WT	P14	F	7.629	0.976825
KODK117.3i	WT	P14	F	7.689	0.984507
KODK117.3j	WT	P14	F	7.053	0.903073
KODK144.1e	WT	P14	F	9.42	1.20615
KODK155.1d	WT	P14	F	7.369	0.943534
KODK155.1f	WT	P14	M	7.799	0.998592
KODK156.1a	WT	P14	F	7.398	0.947247
KODK156.1b	WT	P14	F	8.158	1.04456
KODK156.1c	WT	P14	M	7.203	0.922279
KODK156.1d	WT	P14	M	7.941	1.01677
KODK156.1f	WT	P14	M	7.7	0.985915
TGDK63.1b	WT	P14	M	8.2	1.04994
TGDK63.1c	WT	P14	M	8.4	1.07554
TGDK63.1d	WT	P14	F	9.1	1.16517
KODK144.1a	WT-TG	P14	F	8.34	1.06786
KODK144.1d	WT-TG	P14	M	9.44	1.20871
KODK144.1h	WT-TG	P14	M	8.69	1.11268
KODK155.1a	WT-TG	P14	M	8.07	1.03329
KODK155.1b	WT-TG	P14	M	7.947	1.01754
TGDK63.1a	WT-TG	P14	F	8.8	1.12676
TGDK63.1e	WT-TG	P14	M	9.5	1.21639
KODK117.3b	PAT	P14	M	5.377	0.688476
KODK117.3d	PAT	P14	M	5.211	0.667222
KODK117.3e	PAT	P14	M	5.556	0.711396
KODK117.3h	PAT	P14	F	5	0.640205
KODK144.1b	PAT	P14	M	7.07	0.90525
KODK144.1c	PAT	P14	F	5.52	0.706786
KODK155.1e	PAT	P14	M	5.804	0.74315
KODK155.1h	PAT	P14	M	5.261	0.673624
KODK144.1g	PAT-TG	P14	F	6.8	0.870679
KODK144.1f	PAT-TG	P14	M	6.98	0.893726
KODK155.1c	PAT-TG	P14	M	6.999	0.896159
KODK155.1g	PAT-TG	P14	M	6.421	0.822151
KODK156.1e	PAT-TG	P14	F	6.623	0.848015
KODK36.1h	WT-TG	P21	F	9.16	0.855116
KODK44.4d	WT-TG	P21	M	10.5	0.980209
KODK44.4e	WT-TG	P21	M	11.7	1.09223
KODK44.4g	WT-TG	P21	F	12.4	1.15758
KODK48.1b	WT-TG	P21	F	10.2	0.952203
KODK48.1e	WT-TG	P21	F	10.8	1.00822
KODK48.1f	WT-TG	P21	F	10.4	0.970874
TGDK30.5a	WT-TG	P21	M	12.09	1.12864
TGDK30.5c	WT-TG	P21	F	12.19	1.13798
KODK26.1d	PAT	P21	F	9.11	0.850448
KODK36.1a	PAT	P21	M	7.61	0.710418
KODK36.1e	PAT	P21	F	8.22	0.767364
KODK36.1f	PAT	P21	F	7.93	0.740291
KODK44.4b	PAT	P21	M	10.3	0.961538
KODK48.1a	PAT	P21	M	9.7	0.905527
KODK25.1a	PAT-TG	P21	M	9.98	0.931665
KODK25.1b	PAT-TG	P21	M	10.07	0.940067
KODK25.1c	PAT-TG	P21	M	10.39	0.96994
KODK26.1a	PAT-TG	P21	M	10.72	1.00075
KODK26.1b	PAT-TG	P21	M	8.41	0.785101
KODK25.1d	PAT-TG	P21	F	10.53	0.98301
KODK25.1e	PAT-TG	P21	F	10.79	1.00728
KODK25.1f	PAT-TG	P21	F	9.6	0.896191
KODK26.1c	PAT-TG	P21	F	10.09	0.941934
KODK26.1e	PAT-TG	P21	F	10.18	0.950336
KODK48.1c	PAT-TG	P21	F	9.7	0.905527
KODK44.4c	PAT-TG	P21	M	11.7	1.09223
KODK44.4i	PAT-TG	P21	F	9.6	0.896191

## Sheet: Fig4C_pituitary_volumes
Embryonic stages							Postnatal stages
ID	genotype	age	sex	Vol AP (mm^3)	Vol PP (mm^3)		ID	genotype	age	sex	Vol AL (mm^3)	Vol IL (mm^3)	Vol PL (mm^3)				Genotype	AP Volume (mm^3)				PP Volume (mm^3)
KODK107.5	WT	E13.5	n/a	0.0225711	0.00220988		TGDK46.3i	WT	P7	F	0.075392	0.01974	0.0180779					Mean	SD	p vs WT	p vs PAT	Mean	SD	p vs WT	p vs PAT	n
KODK108.2	WT	E13.5	n/a	0.021714	0.00216784		TGDK46.3a	WT	P7	M	0.072296	0.015413	0.01598			E13.5	WT	0.026863	0.00560584			0.00216878	0.000486264			9
TGDDK 18.2	WT	E13.5	n/a	0.0388736	0.0030175		TGDK46.3b	WT	P7	M	0.09012	0.017886	0.0179793				WT-TG	0.0254533	0.00426683	ns		0.00234257	0.000446144	ns		11
TGDK 10.1	WT	E13.5	n/a	0.0227013	0.00158383		TGDK46.3h	WT	P7	M	0.075672	0.01482	0.013465				PAT	0.0164145	0.00110069	<0.0001		0.00187809	0.000207436	ns		6
TGDK 10.2	WT	E13.5	n/a	0.0265059	0.00265682		KODK71.3	WT	P7	M	0.078238	0.0166106	0.0138407				PAT-TG	0.017169	0.00219214	<0.0001	ns	0.00210083	0.00219214	ns	ns	8
TGDK 18.7	WT	E13.5	n/a	0.0329775	0.00188163		TGDK46.3e	WT-TG	P7	F	0.082804	0.0164279	0.017473			E18.5	WT	0.059964	0.00844996			0.00924261	0.000642548			7
TGDK 5.2	WT	E13.5	n/a	0.0265057	0.00193168		KODK71.11	WT-TG	P7	F	0.075654	0.0128858	0.0131487				WT-TG	0.0664055	0.0058736	ns		0.0095905	0.000623497	ns		5
TGDK 5.3	WT	E13.5	n/a	0.0249305	0.00157953		TGDK46.3d	WT-TG	P7	M	0.090436	0.0169279	0.0188745				PAT	0.0444345	0.00940487	0.0025		0.0102079	0.00156466	ns		7
TGDK 9.2	WT	E13.5	n/a	0.0249869	0.00249028		TGDK46.3g	WT-TG	P7	M	0.077996	0.0164577	0.0166323				PAT-TG	0.0478794	0.00444932	0.167	ns	0.00965346	0.00195065	ns	ns	8
KODK107.6	WT-TG	E13.5	n/a	0.023784	0.00286634		KODK25.2a	PAT	P7	F	0.045088	0.012628	0.017586
KODK107.8	WT-TG	E13.5	n/a	0.0240203	0.00231542		KODK25.2b	PAT	P7	F	0.04616	0.0101268	0.0151729
KODK108.5	WT-TG	E13.5	n/a	0.0210193	0.00249558		KODK25.2e	PAT	P7	F	0.050988	0.014614	0.019098				Genotype	AL Volume (mm^3)				IL Volume (mm^3)				PL Volume (mm^3)
KODK108.6	WT-TG	E13.5	n/a	0.019969	0.00198104		KODK71.4	PAT	P7	F	0.032306	0.0082204	0.00843084					Mean	SD	p vs WT	p vs PAT	Mean	SD	p vs WT	p vs PAT	Mean	SD	p vs WT	p vs PAT	n
TGDK 10.3	WT-TG	E13.5	n/a	0.0220047	0.00199425		KODK71.5	PAT	P7	F	0.039848	0.011008	0.011348			P7	WT	0.0783436	0.00691226			0.0168939	0.00197857			0.0158686	0.00219308			5
TGDK 18.3	WT-TG	E13.5	n/a	0.0267938	0.00203503		KODK71.6	PAT	P7	F	0.035174	0.0107708	0.0123743				WT-TG	0.0817225	0.00652708	ns		0.0156748	0.00187341	ns		0.0165322	0.00243786	ns		4
TGDK 5.1	WT-TG	E13.5	n/a	0.0251889	0.00197545		KODK71.7	PAT	P7	F	0.031728	0.00932426	0.0114013				PAT	0.040641	0.00704003	<0.0001		0.0109846	0.00196734	0.0014		0.0138244	0.00356218	ns		8
TGDK 5.4	WT-TG	E13.5	n/a	0.0229351	0.00169643		KODK25.2g	PAT	P7	M	0.043836	0.0111845	0.0151837				PAT-TG	0.0564696	0.00970947	0.001	0.0074	0.0142808	0.00341204	ns	ns	0.0157141	0.00301513	ns	ns	5
TGDK 9.1	WT-TG	E13.5	n/a	0.0310094	0.00251462		KODK25.2c	PAT-TG	P7	F	0.071094	0.019762	0.02013			P14	WT	0.1601	0.0286			0.0221306	0.00289934			0.0243961	0.00314867			6
TGDK 9.4	WT-TG	E13.5	n/a	0.0313291	0.00281918		KODK25.2d	PAT-TG	P7	M	0.052	0.011878	0.016464				WT-TG	0.1795	0.0306	ns		0.0252498	0.00335699	ns		0.0248918	0.00437821	ns		7
TGDK18.1	WT-TG	E13.5	n/a	0.0319327	0.0030749		KODK25.2f	PAT-TG	P7	M	0.061304	0.0155012	0.0156879				PAT	0.0857	0.0159	0.0007		0.0228528	0.00184754	ns		0.0167756	0.000983484	ns		5
KODK107.1	PAT	E13.5	n/a	0.016498	0.0021075		KODK71.1	PAT-TG	P7	M	0.047034	0.012238	0.0119009				PAT-TG	0.0894	0.0165	0.0046	ns	0.0224766	0.00250521	ns	ns	0.0196458	0.00411582	ns	ns	3
KODK108.1	PAT	E13.5	n/a	0.014594	0.00216866		KODK71.9	PAT-TG	P7	M	0.050916	0.012025	0.0143875			P21	WT	0.197217	0.0251861			0.0360655	0.00357812			0.031716	0.00465147			6
KODK108.4	PAT	E13.5	n/a	0.0168194	0.00169386		KODK44.4a	WT	P21	M	0.190408	0.0243773	0.0224882				WT-TG	0.261741	0.0494179	0.0105		0.0359476	0.00755492	0.0268		0.0347596	0.00436398	ns		8
KODK108.7	PAT	E13.5	n/a	0.0177754	0.0017985		KODK44.4f	WT	P21	F	0.186162	0.0278	0.0334957				PAT	0.154236	0.00431263	ns		0.03012	0.008903	ns		0.0376441	0.00877769	ns		3
KODK23.1a	PAT	E13.5	n/a	0.017	0.0017		KODK44.4h	WT	P21	F	0.162819	0.030223	0.0289902				PAT-TG	0.154855	0.0256929	ns	ns	0.0234144	0.00304677	ns	ns	0.0250766	0.00299625	ns	ns	7
KODK23.1b	PAT	E13.5	n/a	0.0158	0.0018		KODK48.1d	WT	P21	F	0.190056	0.0257105	0.0206014				genotype	Proportional volume AP	Proportional volume IL	Proportional volume PL
KODK107.2	PAT-TG	E13.5	n/a	0.0156361	0.00201126		TGDK30.5b	WT	P21	M	0.228145	0.0315174	0.0338231			E13.5
KODK107.3	PAT-TG	E13.5	n/a	0.018052	0.00294472		TGDK30.5d	WT	P21	F	0.225714	0.0405679	0.0397049				WT-TG	0.947524	n/a	1.08013
KODK107.7	PAT-TG	E13.5	n/a	0.0190352	0.0020441		KODK44.4d	WT-TG	P21	M	0.191436	0.0341641	0.0297065				PAT	0.611045	n/a	0.865966
KODK107.9	PAT-TG	E13.5	n/a	0.013639	0.001696		KODK44.4e	WT-TG	P21	M	0.251	0.0342719	0.0259566				PAT-TG	0.639134	n/a	0.96867
KODK108.8	PAT-TG	E13.5	n/a	0.0207897	0.00231054		KODK44.4g	WT-TG	P21	F	0.294268	0.0357876	0.030581			E18.5
KODK23.1d	PAT-TG	E13.5	n/a	0.0173	0.002		KODK48.1b	WT-TG	P21	F	0.216686	0.040084	0.030524				WT-TG	1.10742	n/a	1.03764
KODK23.1e	PAT-TG	E13.5	n/a	0.0169	0.0021		KODK48.1e	WT-TG	P21	F	0.248367	0.046236	0.036272				PAT	0.741019	n/a	1.10444
KODK23.1f	PAT-TG	E13.5	n/a	0.016	0.0017		KODK48.1f	WT-TG	P21	F	0.24171	0.0395	0.0356283				PAT-TG	0.798469	n/a	1.04445
KODK47.2	WT	E18.5	M	0.0703429	0.0099728		TGDK30.5a	WT-TG	P21	M	0.312838	0.038726	0.0338285			P7
KODK47.7	WT	E18.5	M	0.0674098	0.0098372		TGDK30.5c	WT-TG	P21	F	0.337621	0.0432904	0.043382				WT-TG	1.04313	0.927837	1.04182
KODK47.8	WT	E18.5	M	0.0664084	0.008885		KODK44.4b	PAT	P21	M	0.150068	0.0371	0.03043				PAT	0.518753	0.650209	0.87118
KODK52.3	WT	E18.5	F	0.05949	0.009267		KODK48.1a	PAT	P21	M	0.15396	0.0287501	0.0315941				PAT-TG	0.720794	0.845325	0.990262
KODK52.6	WT	E18.5	F	0.0496254	0.0093469		KODK26.1d	PAT	P21	F	0.15868	0.02869	0.03686			P14
KODK52.7	WT	E18.5	M	0.0496254	0.0093469		KODK25.1a	PAT-TG	P21	M	0.156044	0.025288	0.0300822				WT-TG	1.12117	1.14095	1.02032
KODK68.7	WT	E18.5	M	0.0568463	0.0080425		KODK25.1e	PAT-TG	P21	F	0.169118	0.039018	0.0383201				PAT	0.53529	1.03263	0.687632
KODK46.1	WT-TG	E18.5	F	0.074586	0.01018		KODK26.1b	PAT-TG	P21	M	0.123844	0.021212	0.028548				PAT-TG	0.558401	1.01563	0.805284
KODK46.2	WT-TG	E18.5	F	0.0653643	0.008615		KODK26.1e	PAT-TG	P21	F	0.190396	0.03013	0.0460643			P21
KODK47.6	WT-TG	E18.5	F	0.0699614	0.0094575		KODK44.4c	PAT-TG	P21	M	0.178462	0.026846	0.0284281				WT-TG	1.32717	0.99673	1.09597
KODK67.4	WT-TG	E18.5	M	0.0607806	0.0100775		KODK44.4i	PAT-TG	P21	F	0.136504	0.0264	0.023446				PAT	0.782061	0.835147	1.18691
KODK68.1	WT-TG	E18.5	M	0.0613352	0.0096225		KODK48.1c	PAT-TG	P21	F	0.129616	0.0247	0.0274388				PAT-TG	0.785199	0.649219	0.790662
KODK46.5	PAT	E18.5	F	0.0488051	0.0106105		KODK144.1e	WT		F	0.196596	0.0270677	0.026902
KODK47.5	PAT	E18.5	M	0.0473023	0.0100275		TGDK63.1b	WT		M	0.180348	0.0219257	0.02695
KODK46.6	PAT	E18.5	M	0.050771	0.010303		TGDK63.1c	WT		M	0.15761	0.0230823	0.0276856
KODK52.4	PAT	E18.5	F	0.0284153	0.0070263		TGDK63.1d	WT		F	0.172308	0.0185128	0.022948
KODK52.5	PAT	E18.5	M	0.0567888	0.0122035		KODK155.1d	WT		F	0.126094	0.0202359	0.0210868
KODK52.2	PAT	E18.5	M	0.0379165	0.01068		KODK156.1a	WT		F	0.12842	0.0219592	0.0208044
KODK67.7	PAT	E18.5	M	0.0410426	0.0106045		KODK144.1a	WT-TG		F	0.18374	0.0281991	0.02786
KODK35.7	PAT-TG	E18.5	M	0.0424634	0.00791607		KODK144.1d	WT-TG		M	0.1944	0.0280819	0.026987
KODK46.9	PAT-TG	E18.5	F	0.0562525	0.00909623		KODK144.1h	WT-TG		M	0.193574	0.0297145	0.0287276
KODK46.4	PAT-TG	E18.5	F	0.0506241	0.01031		TGDK63.1a	WT-TG		F	0.231382	0.0245243	0.0296499
KODK47.4	PAT-TG	E18.5	M	0.0437293	0.0107241		TGDK63.1e	WT-TG		M	0.1486	0.0223452	0.019354
KODK68.8	PAT-TG	E18.5	F	0.0454674	0.00866058		KODK155.1a	WT-TG		M	0.158678	0.0221806	0.0214762
KODK68.3	PAT-TG	E18.5	M	0.0459362	0.0100025		KODK155.1b	WT-TG		M	0.14586	0.0217029	0.020188
KODK68.6	PAT-TG	E18.5	M	0.0486286	0.00710575		KODK144.1b	PAT		M	0.092332	0.0232274	0.017732
KODK67.1	PAT-TG	E18.5	M	0.049934	0.0134125		KODK144.1c	PAT		F	0.1038	lost	lost
							KODK144.1g	PAT		F	0.094384	0.025258	0.0169176
							KODK155.1e	PAT		M	0.07117	0.020988	0.017052
							KODK155.1h	PAT		M	0.067294	0.0219377	0.0154007
							KODK144.1f	PAT-TG		M	0.10812	0.0261485	0.018518
							KODK155.1g	PAT-TG		M	0.082828	0.0225052	0.024208
							KODK156.1e	PAT-TG		F	0.0773	0.018776	0.0162115

## Sheet: Fig4D_E_volume_number
ID	sex	genotype	Vol AL (mm^3)	Vol PL (mm^3)	Vol IL (mm^3)	Cells (mil)
KODK177_2g	f	PAT	0.501765	0.0491027	0.054198	7.13218			Genotype	AL Volume (mm^3)			IL Volume (mm^3)			PL Volume (mm^3)
KODK177_3e	f	PAT	0.515514	0.054576	0.048096	6.419				Mean	SD	p vs WT	Mean	SD	p vs WT	Mean	SD	p vs WT	n
KODK177_3f	f	PAT	0.553461	0.058341	0.048789	7.60372		Males	WT	0.57	0.081		0.066	0.011		0.052	0.008		4
KODK177_3g	f	PAT	0.51777	0.0593818	0.066096	7.5098			WT-TG	0.742	0.04	0.0126	0.08	0.014	0.4595	0.061	0.006	0.2376	3
KODK177_3h	f	PAT	0.504933	0.055143	0.052971	7.60244			PAT	0.407	0.031	0.0195	0.046	0.007	0.1942	0.05	0.008	0.9266	3
KODK182_1c	m	PAT	0.374235	0.041931	0.044133	5.33663			PAT-TG	0.555	0.073	0.9789	0.067	0.021	0.9972	0.059	0.007	0.2636	6
KODK183_1c	m	PAT	0.436451	0.048267	0.0403291	5.76549		Females	WT	0.582	0.06		0.059	0.019		0.05	0.003		3
KODK183_1d	m	PAT	0.411534	0.058257	0.053283	4.58365			WT-TG	0.837	0.151	0.008	0.065	0.012	0.8977	0.06	0.01	0.2003	3
KODK182_1f	f	WT-TG	0.666771	0.0505439	0.052227	8.47737			PAT	0.509	0.021	0.4895	0.054	0.007	0.9503	0.055	0.004	0.5488	5
KODK182_1g	f	WT-TG	0.956055	0.058407	0.067551	11.4251			PAT-TG	0.404	0.034	0.0329	0.043	0.006	0.5085	0.048	0.007	0.9841	2
KODK177_3d	f	WT-TG	0.887571	0.069867	0.075408	12.0645
KODK177_2b	m	WT-TG	0.701856	0.0547924	0.074067	9.11371
KODK177_2c	m	WT-TG	0.744198	0.0606605	0.095421	9.28874
KODK177_3a	m	WT-TG	0.781008	0.066312	0.070266	8.43163
KODK183_1f	f	PAT-TG	0.428514	0.0533239	0.047055	6.37317
KODK183_1g	f	PAT-TG	0.379881	0.0431276	0.0387715	5.26807
KODK177_2a	m	PAT-TG	0.532398	0.052695	0.072075	6.42986
KODK177_2e	m	PAT-TG	0.62406	0.057552	0.068886	7.77132
KODK177_2f	m	PAT-TG	0.460332	0.0612537	0.053838	5.83172
KODK183_1b	m	PAT-TG	0.48462	0.05056	0.038136	5.91825
KODK177_3b	m	PAT-TG	0.623628	0.068472	0.06963	7.50738
KODK177_3c	m	PAT-TG	0.605049	0.063255	0.10221	6.66051
KODK177_2h	f	WT	0.524613	0.0496962	0.066906	7.8219
KODK177_2i	f	WT	0.644547	0.049692	0.0719728	9.25201
KODK183_1e	f	WT	0.57726	0.050253	0.036594	8.38319
KODK182_1a	m	WT	0.50427	0.0534763	0.071004	7.13327
KODK182_1b	m	WT	0.586266	0.0479426	0.0559956	7.95189
KODK182_1d	m	WT	0.678072	0.0620041	0.078558	9.63748
KODK183_1a	m	WT	0.50964	0.044598	0.05826	7.1331

## Sheet: Fig4F_RTqPCR
ID	sex	genotype	Dlk1	Ghrh	Sst
KODK177_2g	f	PAT	0.0289084	0.927961	1.03558
KODK177_3e	f	PAT	0.0258077	1.45121	0.957006
KODK177_3f	f	PAT	0.0216973	1.32504	0.928091
KODK177_3g	f	PAT	0.0236915	1.09956	0.814229
KODK177_3h	f	PAT	0.0280475	0.973513	0.719538
KODK182_1c	m	PAT	0.0875228	0.754991	0.785347
KODK183_1c	m	PAT	0.182711	0.716444	0.721036
KODK183_1d	m	PAT	0.0304784	1.14652	0.854397
KODK182_1f	f	TG	2.42306	0.974442	0.910326
KODK182_1g	f	TG	2.38889	1	0.975669
KODK177_3d	f	TG	1.91441	1.45466	0.840622
KODK177_2b	m	TG	2.04359	0.639927	1.14473
KODK177_2c	m	TG	1.80837	0.586945	0.937972
KODK177_2d	m	TG	1.5217	0.649885	0.780252
KODK177_3a	m	TG	0.499359	0.632194	1.03782
KODK182_1e	f	TG-PAT	0.0548805	0.6759	0.650285
KODK183_1f	f	TG-PAT	0.0479097	0.771829	0.614834
KODK183_1g	f	TG-PAT	0.0576417	0.698623	0.828312
KODK177_2a	m	TG-PAT	0.0935618	0.615987	1.22843
KODK177_2e	m	TG-PAT	0.0750025	0.714886	0.906212
KODK177_2f	m	TG-PAT	0.102115	0.594756	0.969963
KODK177_3b	m	TG-PAT	0.0590275	1.23485	0.990831
KODK177_3c	m	TG-PAT	0.158766	1.3503	1.06793
KODK177_2i	f	WT	1.56663	0.724965	0.79965
KODK183_1e	f	WT	1.75956	0.860441	0.978431
KODK182_1a	m	WT	2.05288	0.663171	1.23098
KODK182_1b	m	WT	1.81447	0.658255	0.770822
KODK182_1d	m	WT	2.12872	0.802453	0.898696
RTqPCT data of hypothalamic gene expression in 8-week-old mice, normalised to actin.
