# Supplementary material for: Imprinted Dlk1 dosage as a size determinant of the mammalian pituitary gland
Source: eLife journal article supplement (doi:10.7554/elife.84092), 2023-08-17
Supplement: supp [file Figure5&6_data.xlsx]

## Sheet: Fig5ABC&Fig6AB_pHH3
ID	genotype	age	sex	%phh3+ CL	%pHH3+ NC	%phh3+ TOT
KODK96.9	WT	E11.5	n/a	-	-	4.329				Genotype	CL % p-HH3		NC % p-HH3		Total % p-HH3
KODK96.11	WT	E11.5	n/a	-	-	7.11462					Mean	SD	Mean	SD	Mean	SD	n
KODK96.8	WT	E11.5	n/a	-	-	5.42816			E11.5	WT	-	-	-	-	5.58935	1.0379	5
KODK98.4	WT	E11.5	n/a	-	-	5.11164				WT-TG	-	-	-	-	6.55934	1.25584	4
KODK98.6	WT	E11.5	n/a	-	-	5.9633				PAT	-	-	-	-	6.8023	2.89041	4
KODK96.1	WT-TG	E11.5	n/a	-	-	7.99598				PAT-TG	-	-	-	-	7.01852	2.26945	4
KODK96.5	WT-TG	E11.5	n/a	-	-	5.71099			E13.5	WT	24.3397	3.42231	4.00942	1.90976	11.7703	3.08709	7
KODK98.3	WT-TG	E11.5	n/a	-	-	5.32319				WT-TG	24.2939	2.68024	4.70984	1.28642	12.4875	2.88444	8
KODK98.10	WT-TG	E11.5	n/a	-	-	7.20721				PAT	19.8937	2.28065	3.52782	1.03737	9.6939	0.854321	7
KODK96.4	PAT	E11.5	n/a	-	-	11.1299				PAT-TG	18.8538	2.48406	2.94731	0.781132	9.06029	1.35754	8
KODK96.6	PAT	E11.5	n/a	-	-	5.50191			E18.5	WT	10.3445	1.43347	8.46151	0.431259	8.93767	0.304914	5
KODK98.5	PAT	E11.5	n/a	-	-	5.11273				WT-TG	10.5569	2.25738	8.42434	2.10087	8.97276	2.00413	7
KODK98.11	PAT	E11.5	n/a	-	-	5.46465				PAT	10.6377	2.91481	8.75929	3.66312	9.24771	3.42015	8
KODK96.2	PAT-TG	E11.5	n/a	-	-	10.1729				PAT-TG	11.1892	2.8625	11.0205	3.49599	11.007	3.20222	8
KODK96.3	PAT-TG	E11.5	n/a	-	-	5.04202			P7	WT	12.7089	1.22067	4.57843	1.6339	5.14869	1.59099	6
KODK98.8	PAT-TG	E11.5	n/a	-	-	5.75853				WT-TG	5.72717	1.15228	2.32585	0.248157	2.55281	0.287708	3
KODK98.1	PAT-TG	E11.5	n/a	-	-	7.10059				PAT	12.9085	3.91203	7.16891	0.727859	7.58774	0.857397	6
KODK107.4	WT	E13.5	n/a	25.2874	2.63736	12.4533				PAT-TG	11.8704	4.22488	5.50358	0.901247	5.94406	0.633714	4
KODK107.5	WT	E13.5	n/a	26.07	2.17391	8.35851			P14	WT	3.92435	1.22067	9.17894	1.25001	8.91416	1.24098	4
KODK108.2	WT	E13.5	n/a	20.4167	2.66876	7.52566				WT-TG	5.56483	2.10673	11.3239	0.9469	11.5215	0.867365	5
TGDK 10.1	WT	E13.5	n/a	29.9325	5.6218	15.5299				PAT	4.54313	1.51449	7.69618	0.785106	7.65892	0.872572	3
TGDK 10.2	WT	E13.5	n/a	21.0395	3.85854	11.8931				PAT-TG	4.7619	nd	6.97386	nd	6.86661	nd	1
TGDK 18.2	WT	E13.5	n/a	25.8497	7.48249	15.332			P21	WT	5.66379	1.0937	1.57429	0.223771	1.82109	0.245169	3
TGDK 9.2	WT	E13.5	n/a	21.7824	3.62308	11.2996				WT-TG	7.34521	0.363849	1.64624	0.48706	2.06744	0.467929	3
KODK107.6	WT-TG	E13.5	n/a	25.8741	2.3845	9.40439				PAT	6.00581	1.43777	1.8095	0.147087	2.04219	0.197161	2
KODK107.8	WT-TG	E13.5	n/a	24.7387	4.24354	11.339				PAT-TG	6.52174	1.57803	2.42389	0.369048	2.70089	0.46109	3
KODK108.5	WT-TG	E13.5	n/a	22.0077	4.1791	9.14962
KODK108.6	WT-TG	E13.5	n/a	19.0972	5.38721	9.86395
TGDK 10.3	WT-TG	E13.5	n/a	27.7031	6.91915	16.3246
TGDK 18.1	WT-TG	E13.5	n/a	24.0649	5.20623	15.4628
TGDK 9.1	WT-TG	E13.5	n/a	26.1709	4.89121	14.4014
TGDK 9.4	WT-TG	E13.5	n/a	24.6944	4.46778	13.9544
KODK107.1	PAT	E13.5	n/a	23.221	2.52708	9.257
KODK108.1	PAT	E13.5	n/a	16.9916	4.06504	9.51821
KODK108.4	PAT	E13.5	n/a	18.1818	4.44811	8.96018
KODK108.7	PAT	E13.5	n/a	20.3279	2.56881	8.94118
KODK23.1a	PAT	E13.5	n/a	21.9512	4.97512	11.4198
KODK23.1b	PAT	E13.5	n/a	17.9426	3.71058	9.92685
KODK23.1c	PAT	E13.5	n/a	20.6395	2.4	9.83412
KODK107.2	PAT-TG	E13.5	n/a	21.5054	4.29594	11.1748
KODK107.3	PAT-TG	E13.5	n/a	17.663	3.17195	8.68666
KODK107.7	PAT-TG	E13.5	n/a	22.9452	2.21402	9.47242
KODK107.9	PAT-TG	E13.5	n/a	16.1972	1.91205	6.93928
KODK108.8	PAT-TG	E13.5	n/a	19.322	2.26904	7.78509
KODK23.1d	PAT-TG	E13.5	n/a	15.8879	3.22581	8.72211
KODK23.1e	PAT-TG	E13.5	n/a	19.6172	3.44203	10.4124
KODK23.1f	PAT-TG	E13.5	n/a	17.6923	3.04762	9.28962
KODK33.7	WT	E18.5	F	10.0748	8.28444	8.71014
KODK34.4	WT	E18.5	M	12.7077	7.85783	9.06959
KODK47.7	WT	E18.5	M	9.05495	8.46359	8.61193
KODK52.6	WT	E18.5	F	10.4793	9.00081	9.38055
KODK68.7	WT	E18.5	M	9.40599	8.70088	8.91615
KODK33.4	WT-TG	E18.5	F	9.76272	7.3039	7.93405
KODK33.5	WT-TG	E18.5	M	8.6582	5.9353	6.63855
KODK34.6	WT-TG	E18.5	M	15.0407	11.3039	12.2312
KODK34.9	WT-TG	E18.5	F	8.63618	9.51061	9.20153
KODK46.2	WT-TG	E18.5	F	9.65244	7.66902	8.26026
KODK46.1	WT-TG	E18.5	F	10.3022	6.51322	7.50903
KODK67.4	WT-TG	E18.5	M	11.846	10.7344	11.0347
KODK33.6	PAT	E18.5	M	9.59724	6.87563	7.64659
KODK33.9	PAT	E18.5	F	15.5955	14.9295	15.121
KODK46.6	PAT	E18.5	M	9.97428	7.90409	8.5374
KODK46.5	PAT	E18.5	F	5.90909	5.24806	5.39585
KODK67.7	PAT	E18.5	F	12.5595	11.2003	11.5375
KODK52.2	PAT	E18.5	M	10.4136	4.96946	6.23371
KODK52.4	PAT	E18.5	F	8.62319	6.48137	7.04928
KODK52.5	PAT	E18.5	F	12.4289	12.466	12.4603
KODK33.11	PAT-TG	E18.5	F	10.4315	8.5374	9.03012
KODK34.7	PAT-TG	E18.5	M	16.3158	18.2879	17.4497
KODK34.8	PAT-TG	E18.5	M	13.4525	12.0936	12.4634
KODK46.9	PAT-TG	E18.5	F	10.4444	8.58493	8.9945
KODK68.8	PAT-TG	E18.5	F	8.41209	7.92005	8.05268
KODK68.3	PAT-TG	E18.5	M	7.68917	8.67381	8.32819
KODK68.6	PAT-TG	E18.5	M	12.931	13.1098	13.0525
KODK67.1	PAT-TG	E18.5	M	9.83735	10.9569	10.6846
TGDK46.3f	WT	P7	F	11.8694	2.99086	3.74873
TGDK46.3i	WT	P7	F	14.2857	3.80739	4.42571
TGDK46.3a	WT	P7	M	12.069	4.79537	5.20671
TGDK46.3b	WT	P7	M	12.5	2.9917	3.55781
TGDK46.3h	WT	P7	M	13.1673	5.84341	6.28486
KODK71.3	WT	P7	M	12.362	7.04184	7.66831
TGDK46.3e	WT-TG	P7	F	4.4335	2.05347	2.22701
TGDK46.3d	WT-TG	P7	M	6.10465	2.5391	2.77198
TGDK46.3g	WT-TG	P7	M	6.64336	2.38497	2.65945
KODK25.2a	PAT	P7	F	18.1102	6.8556	7.57767
KODK25.2b	PAT	P7	F	6.36943	6.46133	6.45259
KODK25.2e	PAT	P7	F	13.7324	6.69968	7.23702
KODK71.5	PAT	P7	F	12.6394	7.73196	8.12333
KODK71.6	PAT	P7	F	14.9798	8.36836	8.93855
KODK25.2g	PAT	P7	M	11.6197	6.89655	7.19731
KODK25.2c	PAT-TG	P7	F	13.1148	6.17402	6.55553
KODK25.2d	PAT-TG	P7	M	17.2932	4.30906	5.26026
KODK25.2f	PAT-TG	P7	M	8.96552	5.30571	5.55556
KODK71.1	PAT-TG	P7	M	8.10811	6.22554	6.40489
KODK144.1b	PAT	P14	M	5.61404	8.51063	8.54379
KODK144.1c	PAT	P14	F		7.63377	7.63377
KODK144.1g	PAT	P14	F	3.47222	6.94415	6.79919
KODK144.1f	PATTG	P14	M	4.7619	6.97386	6.86661
KODK144.1a	TG	P14	F	8.92193	11.4808	11.3075
KODK144.1d	TG	P14	M	6.0207	12.4995	12.233
KODK144.1h	TG	P14	M	5.06879	10.5018	10.1997
TGDK63.1a	TG	P14	F	4.42029	11.8975	11.5032
TGDK63.1e	TG	P14	M	3.39244	10.24	12.364
KODK144.1e	WT	P14	F	5.20922	10.2179	9.99997
TGDK63.1b	WT	P14	M	4.5977	10.2248	9.9175
TGDK63.1c	WT	P14	M	3.4188	7.72356	7.51455
TGDK63.1d	WT	P14	F	2.47168	8.54949	8.22461
KODK48.1a	PAT	P21	M	4.98915	1.70549	1.90278
KODK44.4b	PAT	P21	M	7.02247	1.9135	2.1816
KODK44.4c	PATTG	P21	M	6.15764	2.19255	2.44129
KODK44.4i	PATTG	P21	F	8.25	2.84949	3.23326
KODK48.1c	PATTG	P21	F	5.15759	2.22963	2.42813
KODK44.4d	TG	P21	M	6.93642	1.10471	1.54045
KODK44.4e	TG	P21	M	7.46562	2.0485	2.43425
KODK44.4g	TG	P21	F	7.63359	1.78549	2.22761
KODK44.1a	WT	P21	M	4.90196	1.33051	1.53802
KODK48.1d	WT	P21	F	6.917	1.62199	1.96633
KODK44.4f	WT	P21	M	5.17241	1.77036	1.95891

## Sheet: Fig5G_POUF1
	%POU1F1
Pat	16.56
Pat	13.22
Pat	14.07
Pat	11.02
Pat	25.18
Pat	20.33
Pat	16.18
Pat	15.86
Pat	17.15
Pat-TG	12.55
Pat-TG	12.42
Pat-TG	17.38
Pat-TG	15
Pat-TG	14.06
Pat-TG	13.63
Pat-TG	14.31
WT	11.4839
WT	12.5
WT	7.4
WT	9.72
WT	11.31
WT	9.8
WT	8.1
WT-TG	4.74
WT-TG	10
WT-TG	7.54
WT-TG	4.05
WT-TG	7.53
WT-TG	6.44

## Sheet: Fig5H_HES1
	%HES1
Pat	52.61
Pat	62.14
Pat	59.96
Pat	59.83
Pat-TG	49.7
Pat-TG	45.8
Pat-TG	54.04
Pat-TG	52.92
WT	48.58
WT	52.98
WT	58.1
WT-TG	59.61
WT-TG	52.79
WT-TG	59.57
WT-TG	60.32
WT-TG	63.57

## Sheet: Fig6DE_SOX2
Genotype	%total SOX2	SOX2volume_mm^3
PAT	11.5209	0.0177376
PAT	10.9375	0.0164137
PAT	13.0342	0.0206826
PAT	13.8281	0.022125
PAT-TG	9.98146	0.0178131
PAT-TG	12.5067	0.0170721
PAT-TG	11.6744	0.0151319
PAT-TG	12.9799	0.0202544
WT	11.051	0.021042
WT	12.9546	0.0246211
WT	11.431	0.0212801
WT	15.4557	0.0352614
WT-TG	14.2816	0.0273401
WT-TG	13.9759	0.0350796
WT-TG	14.5314	0.0427612
WT-TG	16.7786	0.0363569
WT-TG	16.6717	0.041407
WT-TG	17.8932	0.0432497
WT-TG	16.0606	0.0542239
WT-TG	15.4739	0.0484081

## Sheet: Fig6IJ_Culture
Experiment 230317		Born	Weeks	Geno	#	size
	TGI10.1	2017-12-23	13	TG	22.3333	25.988
	TGI10.2	2017-12-23	13	WT	16	13.1406
	TGI10.3	2017-12-23	13	TG	16.3333	24.5329
	TGI10.4	2017-12-23	13	WT	13	14.3668
Experiment 15/3/17
	TGH8.1	2017-11-24	16	TG	22.5	15.89
	TGH8.2	2017-11-24	16	WT	16.7	15.2639
	TGH8.3	2017-11-24	16	TG	9.2	19.619
Experiment 6/9/17
	TGK4.3	2017-06-06	13	TG	19.75	6.9688
	TGK4.4	2017-06-06	13	TG	32.75	7.16857
	TGK4.5	2017-06-06	13	TG	19	6.80735
	TGK4.6	2017-06-06	13	WT	7	8.94
Experiment 2/8/17
	TGK2.1	2017-04-24	14	TG	17.6667	16.2863
	TGK2.2	2017-04-24	14	TG	28.3333	22.6667
	TGK2.3	2017-04-24	14	WT	14.5	7.89574
	TGK2.4	2017-04-24	14	WT	13.6667	7.54444
